## Articles of interest in other COB journals

From *Journal of Cell Science*

### **Identification of a developmentally regulated pathway of membrane retrieval in neuronal growth cones**

**Bonanomi, D., Fornasiero, E. F., Valdez, G., Halegoua, S., Benfenati, F., Menegon, A. and Valtorta, F.**

Bonanomi, D. et al. 2008. *J. Cell Sci.* doi: 10.1242/jcs.033803

### **The role of Delta-like 1 shedding in muscle cell self-renewal and differentiation**

**Sun, D., Li, H. and Zolkiewska, A.**

Sun, D. et al. 2008. *J. Cell Sci.* doi: 10.1242/jcs.035493
